# Supplementary material for: Correlation of PIK3CA mutation with programmed death ligand-1 (PD-L1) expression and their clinicopathological significance in colorectal cancer
Source: PubMed Central journal article supplement — Ann Transl Med. 2021 Sep;9(18):1406. doi: 10.21037/atm-21-2315 (PMC8506770; doi:10.21037/atm-21-2315), 2021-09
Supplement: atm-09-18-1406-dss.pdf [file atm-09-18-1406-dss.pdf]

| Data Sharing Statement |                                                                                                                                                    |                                                                                                                  |
|------------------------|----------------------------------------------------------------------------------------------------------------------------------------------------|------------------------------------------------------------------------------------------------------------------|
| <b>Article Info</b>    | <a href="https://dx.doi.org/10.21037/atm-21-2315">https://dx.doi.org/10.21037/atm-21-2315</a>                                                      |                                                                                                                  |
| <b>Item</b>            | <b>Question</b>                                                                                                                                    | <b>Authors' Response<br/>(place "-" if not applicable)</b>                                                       |
| 1                      | Would you like to share data collected for your study to others?                                                                                   | Yes                                                                                                              |
| 2                      | If not, would you like to share the reason for your decision?                                                                                      | -                                                                                                                |
| 3                      | What data in particular will be shared?                                                                                                            | The survival data will be shared                                                                                 |
| 4                      | Any other documents will be share? Such as study protocol, statistical analysis plan, informed consent form, clinical study report, analytic code. | Statistical analysis plan and clinical study report will also be shared if requested.                            |
| 5                      | When will data availability begin?                                                                                                                 | From the publication date.                                                                                       |
| 6                      | When will data availability end?                                                                                                                   | Two years within the publication date, since the survival date may be updated over time.                         |
| 7                      | To whom will you share the data?                                                                                                                   | Medical oncologists and surgeons who are interested in studies of colorectal cancer.                             |
| 8                      | For what type of analysis or purpose?                                                                                                              | For analysis to evaluate the value of PIK3CA and PD-L1 in colorectal cancer patients.                            |
| 9                      | How or where can the data/documents be obtained?                                                                                                   | Emails can be sent to the corresponding author.                                                                  |
| 10                     | Any other restrictions?                                                                                                                            | We may balance the potential benefits and risks for each request and then provide the data that could be shared. |
