# Supplementary material for: Correlation of PIK3CA mutation with programmed death ligand-1 (PD-L1) expression and their clinicopathological significance in colorectal cancer
Source: PubMed Central journal article supplement — Ann Transl Med. 2021 Sep;9(18):1406. doi: 10.21037/atm-21-2315 (PMC8506770; doi:10.21037/atm-21-2315), 2021-09
Supplement: atm-09-18-1406-supplementary.pdf [file atm-09-18-1406-supplementary.pdf]

**Table S1** Summary of *PIK3CA* mutation in colorectal cancers

| Exon | Nucleotide      | AA mutation | Domain  | Cases |
|------|-----------------|-------------|---------|-------|
| 9    | c.1633G>A       | p.E545K     | Helical | 11    |
| 9    | c.1624G>A       | p.E542K     | Helical | 8     |
| 9    | c.1636C>G       | p.Q546E     | Helical | 3     |
| 9    | c.1637A>G       | p.Q546R     | Helical | 3     |
| 9    | c.1635G>C       | p.E545D     | Helical | 1     |
| 9    | c.1637A>C       | p.Q546P     | Helical | 1     |
| 20   | c.3140A>G       | p.H1047R    | Kinase  | 6     |
| 20   | c.3140A>T       | p.H1047L    | Kinase  | 2     |
| 20   | c.3139C>T       | p.H1047Y    | Kinase  | 1     |
| 20   | c.3061T>C       | p.Y1021H    | Kinase  | 1     |
| 20   | c.3085G>T       | p.D1029Y    | Kinase  | 1     |
| 20   | c.3129G>A       | p.M1043I    | Kinase  | 1     |
| 4    | c.1031T>G       | p.V344G     | C2      | 2     |
| 4    | c.1049A>G       | p.D350G     | C2      | 1     |
| 4    | c.1030G>A       | p.V344M     | C2      | 1     |
| 1    | c.277C>T        | p.R93W      | ABD     | 1     |
| 1    | c.263G>A        | p.R88Q      | ABD     | 1     |
| 1    | c.112C>T        | p.R38C      | ABD     | 1     |
| 1    | c.328_330delGAA | p.E109del   | N/S     | 1     |
| 7    | c.1258T>C       | p.C420R     | C2      | 1     |
| 13   | c.2176G>A       | p.E726K     | N/S     | 1     |
| 5    | c.1090G>A       | p.G364R     | C2      | 1     |

AA, amino acid; ABD, adapter binding domain; N/S, not specified.
